# Supplementary material
Source: Research Square preprint supplement (doi:10.21203/rs.3.rs-9886356/v1)
Supplement: Supplementary file 1 [file 03dff7a56d2549ace95ef229.docx]

# Supplementary File 3

Start of Block: Personal Information and Contact Details

First name

________________________________________________________________

Last name

________________________________________________________________

| 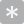 |
| --- |

Mobile phone number (check there are no spaces before or after)

________________________________________________________________

| 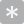 |
| --- |

Email address (check there are no spaces before or after)

________________________________________________________________

Have you taken part in the Aussie-FIT (WA) or League-FIT (QLD) programs before?

- No I have not taken part previously
- Yes I have taken part in Aussie-FIT in WA
- Yes I have taken part in League-FIT in QLD

Click on the arrow to continue.  Your contact details will only be used to contact you about the Aussie-FIT program. If you do not have a mobile phone number or if you do not have an email address, please contact an Aussie-FIT team member in your area.

End of Block: Personal Information and Contact Details

Start of Block: Previous Participant

Thank you for your interest in Aussie-FIT. We are prioritising places on the program for those that have not taken part before. If there are still places available before enrolment sessions start, we will get in contact with you. If you have made an error in the form and you have not taken part previously, please contact an Aussie-FIT team member in your area.

Let us know which club / location you may be interested in so we can get in touch if there are still places available.

________________________________________________________________

End of Block: Previous Participant

Start of Block: State / Territory

Which State / Territory are you in?

- Queensland (Brisbane)
- Western Australia (Perth)

End of Block: State / Territory

Start of Block: QLD programs

Which Aussie-FIT club or location in Brisbane are you interested in joining? Please note that the only programs currently scheduled are at [insert club name].

- [insert club name]
- [insert club name]
- Other. Please write your preferred club / location __________________________________________________

End of Block: QLD programs

Start of Block: Other QLD Clubs

Thank you for your interest in Aussie-FIT. There may be more programs coming to Brisbane soon. We will get in touch with you once new programs are announced.  Any questions? Check out our Frequently Asked Questions. If you are still unsure of anything, please contact us.

End of Block: Other QLD Clubs

Start of Block: NT Programs

Which Aussie-FIT club (location) are you interested in joining in Darwin? Please note that the only programs currently scheduled are at [insert club name].

- [insert club name]
- Other. Please write your preferred club / location __________________________________________________

End of Block: NT Programs

Start of Block: Other NT Clubs

Thank you for your interest in Aussie-FIT in Darwin. Programs are coming to two more clubs in and around Darwin in 2024. We will get in touch with you once they are announced. Any questions? Check out our Frequently Asked Questions. If you are still unsure of anything, please contact us.

End of Block: Other NT Clubs 2024

Start of Block: WA Programs

Which Aussie-FIT club or location in Perth are you interested in joining? Please note that the only programs currently scheduled are at [insert club name].

- [insert club name]
- Please write your preferred club / location. __________________________________________________

End of Block: WA Programs

Start of Block: Other WA Clubs

Thank you for your interest in Aussie-FIT. There may be more programs coming to Perth soon. We will get in touch with you once new programs are announced. Any questions? Check out our Frequently Asked Questions. If you are still unsure of anything, please contact us.

End of Block: Other WA Clubs

Start of Block: Gender

Do you identify as male?

- Yes
- No

End of Block: Gender

Start of Block: Ineligible

Thank you for your interest in Aussie-FIT. Based on the information you have provided you are not eligible to take part in the current Aussie-FIT research study. If you would like to discuss this, please contact an Aussie-FIT team member in your area.

End of Block: Ineligible

Start of Block: Age

| 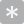 |
| --- |

How old are you?

________________________________________________________________

End of Block: Age

Start of Block: CVD Diagnosis

Do you have a heart condition that has been diagnosed by a doctor (e.g., a heart attack or heart failure)?

- Yes
- No

| Page Break |  |
| --- | --- |

When was your heart condition originally diagnosed?

- Less than 3 months ago
- 3 - 12 months ago
- 1 - 5 years ago
- Over 5 years ago

| Page Break |  |
| --- | --- |

Have you had a recent heart health event in the last 3 months?

- No
- Yes, I have had a recent heart health event

End of Block: CVD Diagnosis

Start of Block: Recent CVD Event Message

As you have had a recent heart condition diagnosis or event, we will phone you to discuss your participation in Aussie-FIT. A member of the Aussie-FIT team will get in touch with you within 7 working days.

End of Block: Recent CVD Event Message

Start of Block: Self-Directed Online Enrolment

You are eligible to take part in Aussie-FIT. Please watch this short video to find out what happens next.

| 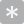 |
| --- |

Please confirm you understand the following information by selecting each statement.

- I will be randomly divided into a group that starts Aussie-FIT straight away or another group that starts Aussie-FIT in 6-months’ time.
- I will likely be able to commit to attending most of the Aussie-FIT program sessions.
- I will be asked to attend up to 3 follow-up measurement sessions in the 12-month period after enrolling.

Continue on to book your enrolment appointment.

End of Block: Self-Directed Online Enrolment

Start of Block: [club name]

Please select a date and time to book your enrolment appointment below. You will need to re-enter your name and contact details. If you don't book online, an Aussie-FIT team member will contact you within 7 working days to progress your enrolment. Any questions? Check out our Frequently Asked Questions. If you are still unsure of anything, please contact us.

End of Block: [club name]

Start of Block: Traditional / Phone Call Enrolment

You are eligible to take part in Aussie-FIT.  An Aussie-FIT team member will contact you within 7 working days to discuss the next steps and book an enrolment appointment to secure your spot. In the meantime, check out our Frequently Asked Questions for more information.

End of Block: Traditional / Phone Call Enrolment

Start of Block: BMI

We use your height and weight to calculate Body Mass Index (BMI). More information about BMI and how it is calculated is available on the Heart Foundation website.

| 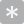 |
| --- |

Please input your height in centimetres

________________________________________________________________

| 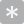 |
| --- |

Please input your weight in kilograms

________________________________________________________________

- I do not know my height and weight

End of Block: BMI

Start of Block: Heart Health Check & CVD Risk

Have you undertaken a heart health check? More information about heart health checks can be found on the Heart Foundation website.

- Yes
- No

Were you told by the person undertaking the heart health check that you are at 'high risk' (>10%) of having a heart attack or stroke in the next 5 years?

- Yes, I was told I was high risk
- No I was told that I was low or moderate risk

End of Block: Heart Health Check & CVD Risk

Start of Block: Recommend CVD risk assessment

You have not met the criteria to take part in Aussie-FIT. If you think you have made an error in the form, please contact an Aussie-FIT team member in your area.  You may still be eligible to participate if you are at 'high risk' of a heart attack or stroke in the next 5 years. You can find out if this is you by having a heart health check. If you are over 45, or over 35 and of Aboriginal or Torres Strait Islander descent, you can arrange to have a free heart health check at a GP practice that bulk bills.

End of Block: Recommend CVD risk assessment
