# Supplementary material
Source: Research Square preprint supplement (doi:10.21203/rs.3.rs-9886356/v1)
Supplement: Supplementary file 3 [file c771f0dcfdc72b0383f9105f.docx]

# Supplementary File 4

1. **Confirm you are speaking to the correct person**
2. **Introduction**
   1. My name is……
   2. I am calling from *[Curtin University / Flinders University / Queensland University of Technology]*
   3. About the Aussie-FIT program that you expressed interest in at *[insert club name]*
3. **Is it a convenient time?** This may take about 10 – 15 minutes
   1. **IF NO**, schedule a follow-up call
4. **Thanks for your interest** in Aussie-FIT (try to develop rapport during these initial stages)
5. **Explain purpose of the call**
   1. Provide more information about the program
   2. Confirm personal details and availability.
   3. Answer any questions you may have about the program.
6. **About Aussie-FIT**
   1. Do you recall much about Aussie-FIT? If no provide a brief summary of the program, and if yes, remind them about the Aussie-FIT program. Briefly:

- Aussie-FIT is a free 12-week program funded by the Heart Foundation that helps men get active, improve their diet, and feel better.
- Sessions last 90-minutes and are held once a week at your football or rugby club and include education and physical activity tailored to your fitness level.
- The physical activity starts off slowly and is inclusive of everyone, no matter your fitness levels. A health professional will be on hand to make sure everyone is safe to do the physical activities.

6.2 Sessions will be held once a week at:

- *[insert club name / location]* on *[insert day of the week]* evenings from *[insert session times]*.

6.3 Confirm the club/location and ask if these days/times suit? Are you available to attend most of the program sessions?

1. **Baseline Appointment**
   1. Before taking part, you will attend an enrolment session at your club which will take about an hour to an hour and a half.
   2. At this session, you will receive more information and be able to ask any questions.
   3. Then if you are happy to take part, researchers will take some measurements (e.g., blood pressure, height, weight, waist, and finger-prick blood sample), ask you some questions about your health and wellbeing, and ask you to wear a physical activity monitor for a few days to track how physically active you are before you participate in the program.
2. **Starting Aussie-FIT**

8.1 You will be asked to attend up to three follow-up measurement sessions (*at 3 months, 6 months, and 12 months)*

8.2 At the end of the enrolment session, you will be randomly divided into a group that starts Aussie-FIT straight away on *[insert date]* or another group that starts Aussie-FIT in 6 months’ time on *[insert date]*

8.3 This helps researchers compare how well the program can help men to improve their health, compared with men that have not started the program yet when we do the follow-up measures.

1. **Schedule the baseline appointment**
   1. Dates available:
   2. *[club name]*: [date 1] OR [date 2]. Booking Link (Acuity Scheduling): *[insert booking link]*
   3. Times are available: from 3pm through until 7pm. *[check the booking link as spots get scheduled]*
   4. Location: *[insert club / venue address]*
   5. Confirm the best email and phone number for the appointment reminders. Read the email address carefully letter-by-letter to ensure it is correct. *[name, email, and mobile phone number are required for the booking form].*
   6. Parking is available and there are nearby public transport options *[mention specifics if required]*.
   7. Do you have any questions about the enrolment session?
2. **Thank you again for your interest**.
   1. Do you have any questions about the Aussie-FIT program or research before I go?
   2. If you think of any at another time, feel free to contact me – details will be provided by email. We will send you email and text message reminders of the appointment.
   3. You will receive an email confirmation of the details that we have provided just now. We look forward to seeing you soon at the enrolment session.
