# Supplementary material
Source: Research Square preprint supplement (doi:10.21203/rs.3.rs-9886356/v1)
Supplement: Supplementary file 4 [file ea3912d4be4d6094bddb447a.docx]

|  |  | **EOIs Not Assigned to Either Enrolment Condition (n=164)** |
| --- | --- | --- |
| Did not schedule baseline | N (%) | 80 (48.8) |
| Baseline self-scheduled* | N (%) | 2 (1.2) |
| Baseline scheduled  via phone | N (%) | 70 (42.7) |
| Baseline scheduled face-to-face | N (%) | 12 (7.3) |
| Total scheduled baselines | N (%) | 84 (51.2) |
| Randomised in host trial | N (%) | 77 (47.0) |
| **Not Assigned:** EOIs not via the website or those that initiated a website EOI but did not complete the eligibility screening questions.  **Note:** four participants randomised in the host trial are not included in this table due to missing information on scheduling source.  *Two participants unassigned to either enrolment condition expressed interest via email and self-scheduled. | | |

Supplementary File 5

EOIs Not Assigned to Either Enrolment Condition
